# Supplementary material
Source: PubMed Central journal article supplement (PMC3720719)
Supplement: NIHMS489005-supplement-8.pdf [file NIHMS489005-supplement-8.pdf]

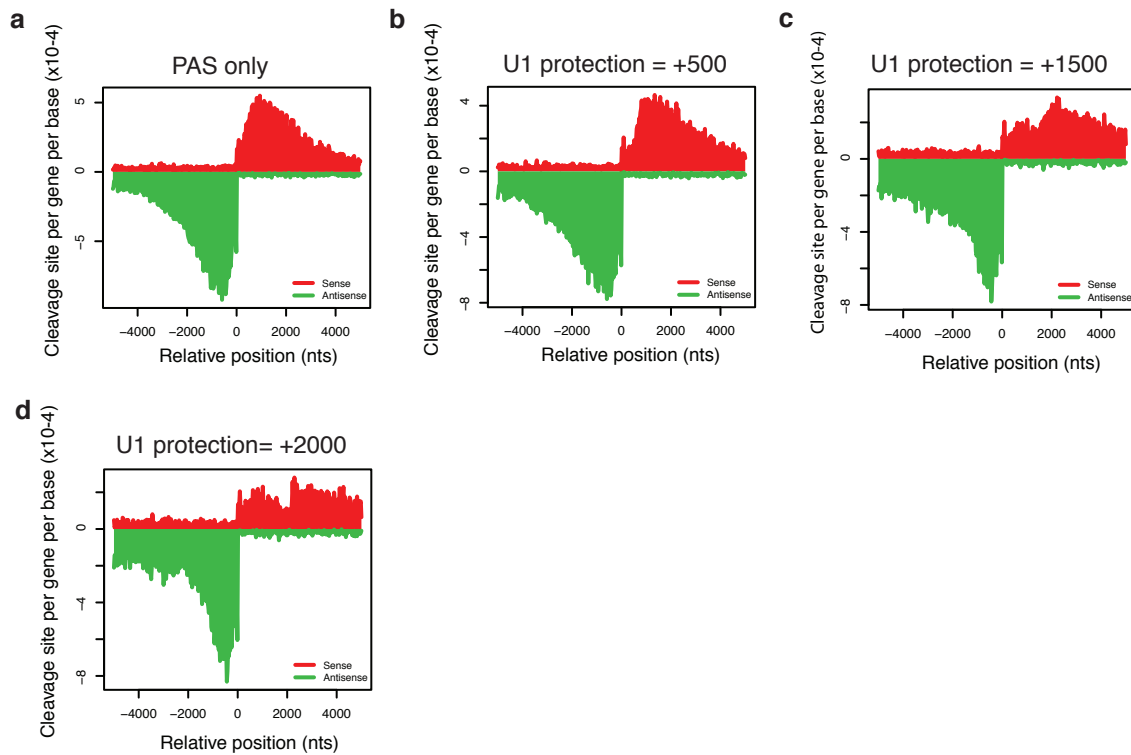

**Supplementary Figure 8. Cleavage site simulation near coding gene TSS.** Plots were generated in the same way as Figure 2d with unique simulated cleavage sites being plotted. Above each simulation plot, U1 protection refers to the zone of protection in nucleotides downstream (+) conferred by a strong U1 site. Metagenes plot of simulated cleavage events considering the PAS (AATAAA) alone (a), or parameters where a PAS is protected if it contains a strong U1 site at least 500 (b), 1500 (c), or 2000 (d) nts upstream. These data demonstrate that the cleavage bias from the simulation is robust when considering protection zones of various sizes.
