# Supplementary material
Source: PubMed Central journal article supplement (PMC3720719)
Supplement: NIHMS489005-supplement-10.pdf [file NIHMS489005-supplement-10.pdf]

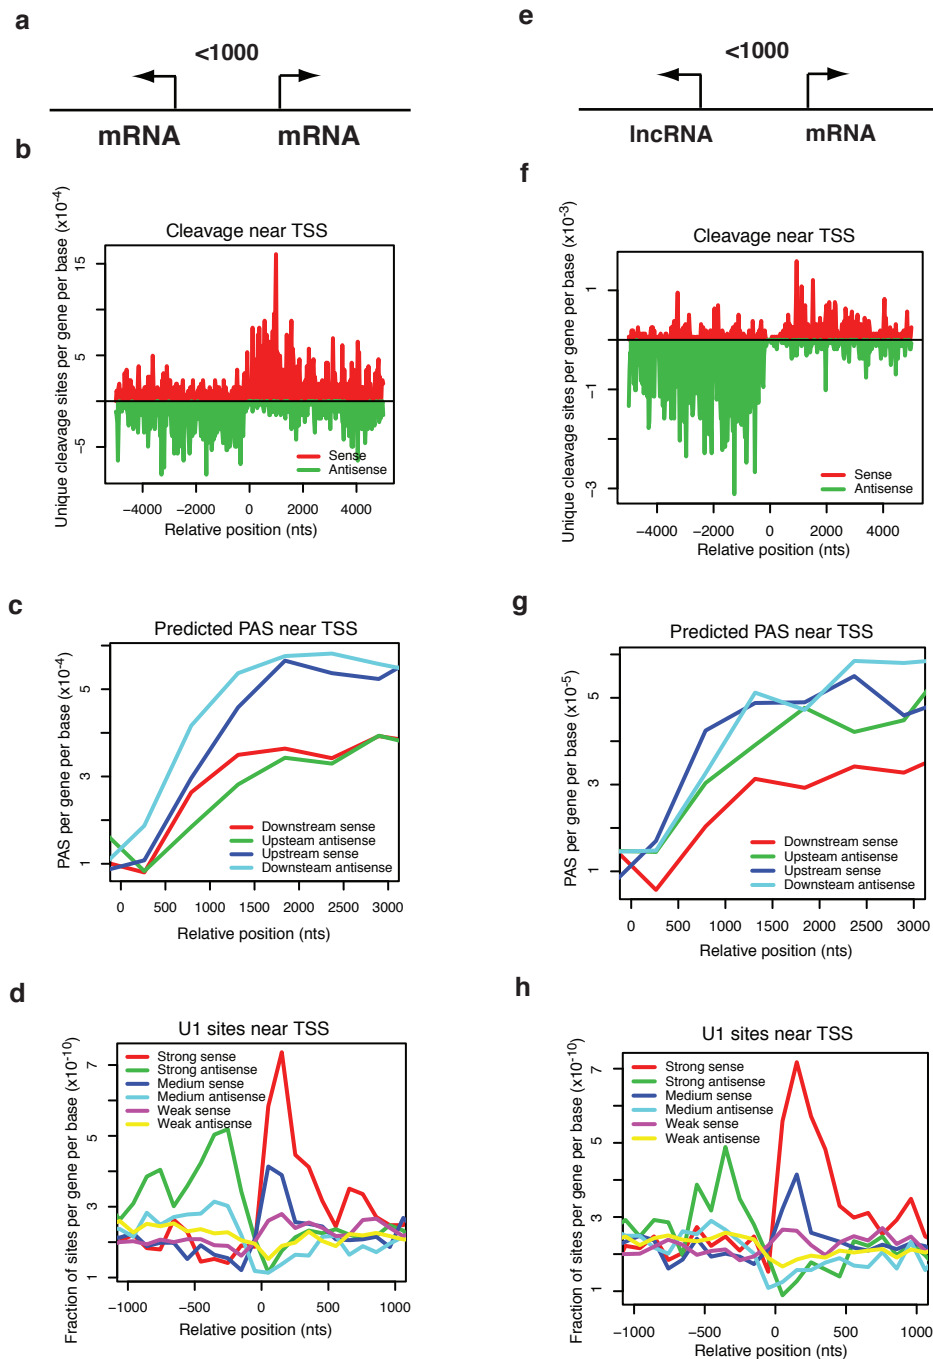

**Supplementary Figure 10. U1-PAS axis at mRNA:mRNA and lncRNA:mRNA gene pairs.**

1047 and 629 mRNA:mRNA and lncRNA:mRNA gene pairs, respectively, were analyzed similarly as in Fig 1a, Fig. 2a, and Fig. 2c, except that larger bins were used (500 bps bin for PAS and 100 bps bin for U1) to smooth the curve due to the low number of genes used to make the plot. For mRNA:mRNA gene pairs position zero represents the TSS of all genes on the + strand. For lncRNA:mRNA gene pairs position zero represents the TSS of the coding gene.
