# Supplementary material
Source: PubMed Central journal article supplement (PMC3720719)
Supplement: NIHMS489005-supplement-12.pdf [file NIHMS489005-supplement-12.pdf]

### 3'-End Sequencing

| Name           | Sequence (5'-3')                                                                                           |
|----------------|------------------------------------------------------------------------------------------------------------|
| RT oligo       | /5phos/TGGAATTCTCGGGTGCCAAGGAACTCCA<br>GTCAC/iSp18/CTTTCCCTACACGACGCTCTTCCGAT<br>CTTTTTTTTTTTTTTTTTTTTTTVN |
| Illumina_PCR_F | AATGATACGGCGACCACCGAGATCTACACTCTTT<br>CCCTACACGACGCTCTTCCGATCT                                             |
| Illumina_PCR_R | CAAGCAGAAGACGGCATAACGAGATCGTGATGTG<br>ACTGGAGTTCCTTGGCACCCGAGAATTCCA                                       |

### 3'-RACE

| Name                       | Sequence (5'-3')                                |
|----------------------------|-------------------------------------------------|
| GeneRacer oligo-dt (RT)    | GCTGTCAACGATACGCTACGTAACGGCATGACA<br>GTG(T)24VN |
| GeneRacer 3' Primer        | GCTGTCAACGATACGCTACGTAACG                       |
| GeneRacer 3' Nested Primer | CGCTACGTAACGGCATGACAGTG                         |
| Pgm2_Gsp-1                 | GGTCTATGGGAGAAGAGAGAACAGG                       |
| Pgm2_Gsp-2                 | GATCAAGAACTTCAGAAAACCCTGACC                     |
| Ccm2_Gsp-1                 | GGA CAT GGT TCA AGA GGC TCC TTC G               |
| Ccm2_Gsp-2                 | GTT CAA GAG GCT CCT TCG TTT CTG TAG             |
| Zcchc2_Gsp-1               | CTG CCG GTC AAG AGT TCT TGG C                   |
| Zcchc2_Gsp-2               | GAG TTC TTG GCA TGC TGT TTG TCA GTC C           |
| Mapk4_Gsp-1                | GGA TTG CTG CCA ATG CCT AGT AAC CTG             |
| Mapk4_Gsp-2                | GCC TAG TAA CCT GTA TTT GAT AGC CAG G           |

### Supplementary Table 1. Oligonucleotides for 3'-end sequencing and 3'-RACE.

(T)24 denotes the 24 'T' nucleotides at the 3'-end of the RT oligonucleotide. V denotes bases (A,G,C) while N denotes bases (A,T,G,C).
